# Supplementary material
Source: publisher site journal article supplement (https://static.cambridge.org/content/id/urn:cambridge.org:id:article:S0317167120000657/resource/name/S0317167120000657supp001.docx)
Supplement: Supplementary file 1 [file S0317167120000657supp001.docx]

| Supplementary table: GCS scores within 10 days by each specific EEG patterns. | | | | | | | | |
| --- | --- | --- | --- | --- | --- | --- | --- | --- |
|  |  | Total  (N=71) | PDs  (N=9) | RDA  (N=4) | SW  (N=8) | Low voltage <20uV  (N=22) | Burst suppression  (N=5) | Others  (N=23) |
| Initial | Median (IQR) | 3 (3-5) | 3 (3-3) | 7 (4-10) | 4 (3-7) | 3 (3-3) | 3 (3-4) | 5 (3-6) |
| Mean±SD | 4.2±2.0 | 3.3±1.0 | 6.8±3.0 | 4.9±2.9 | 3.2±0.4 | 3.2±0.4 | 5.0±2.0 |
| 2 days after CA  (or 2 days after TTM) | Median (IQR) | 3 (3-7) | 3 (3-7) | 8 (5-13) | 3 (3-6) | 3 (3-3) | 3 (3-3) | 8 (5-13) |
| Mean±SD | 5.6±3.9 | 5.0±3.1 | 8.8±4.1 | 4.5±30. | 3.2±0.9 | 3.0±0.0 | 8.5±4.6 |
| 3 days | Median (IQR) | 3 (3-8) | 3 (3-8) | 8 (5-14) | 3 (3-6) | 3 (3-3) | 3 (3-3) | 9 (6-14) |
| Mean±SD | 5.9±4.0 | 4.9±2.6 | 8.8±4.5 | 4.8±3.2 | 3.3±1.3 | 3.0±0 | 9.2±4.4 |
| 4 days | Median (IQR) | 4 (3-8) | 3 (3-8) | 8 (5-13) | 3 (3-5) | 3 (3-3) | 3 (3-4) | 9 (6-14) |
| Mean±SD | 5.9±3.9 | 5.1±3.1 | 8.8±4.1 | 4.5±2.8 | 3.5±1.4 | 3.4±0.5 | 9.2±4.2 |
| 5 days | Median (IQR) | 4 (3-9) | 3 (3-8) | 8 (5-13) | 4 (3-6) | 3 (3-3) | 3 (3-4) | 10 (5-14) |
| Mean±SD | 6.1±4.0 | 5.1±3.1 | 8.5±4.4 | 4.8±3.1 | 3.6±1.5 | 3.2±0.4 | 9.4±4.1 |
| 6 days | Median (IQR) | 5 (3-9) | 4 (3-8) | 9 (6-14) | 4 (3-6) | 3 (3-5) | 3 (3-4) | 9 (6-14) |
| Mean±SD | 6.2±4.0 | 5.3±3.2 | 9.5±4.4 | 4.9±3.4 | 3.8±1.6 | 3.2±0.4 | 9.5±4.1 |
| 7 days | Median (IQR) | 4 (3-9) | 3 (3-8) | 9 (5-14) | 4 (3-6) | 3 (3-4) | 3 (3-4) | 10 (10-14) |
| Mean±SD | 6.2±4.1 | 5.2±3.6 | 9.3±4.4 | 4.8±3.1 | 3.8±1.5 | 3.4±0.5 | 9.6±4.1 |
| 8 days | Median (IQR) | 5 (3-9) | 3 (3-8) | 9 (5-14) | 4 (3-6) | 3 (3-4) | 3 (3-3) | 11 (6-14) |
| Mean±SD | 6.4±4.2 | 5.2±3.6 | 9.3±4.4 | 5.0±3.4 | 3.8±1.4 | 3.0±0.0 | 9.6±4.3 |
| 9 days | Median (IQR) | 5 (3-9) | 3 (3-8) | 10 (5-15) | 4 (3-8) | 3 (3-4) | 3 (3-4) | 11 (6-14) |
| Mean±SD | 6.6±4.4 | 5.3±3.9 | 9.8±5.0 | 5.6±4.0 | 3.9±1.7 | 3.4±0.5 | 10.0±4.1 |
| 10 days | Median (IQR) | 5 (3-11) | 3 (3-8) | 10 (5-15) | 4 (3-7) | 3 (3-5) | 3 (3-4) | 11 (7-14) |
| Mean±SD | 6.9±4.4 | 5.6±4.1 | 10.0±5.2 | 5.6±4.2 | 4.0±1.7 | 3.4±0.5 | 10.8±3.7 |
| Interval changes  for 10 days | Median (IQR) | 1 (0-5) | 0 (0-5) | 3 (1-6) | 0 (-2-4) | 0 (0-2) | 0 (0-1) | 6 (3-9) |
| Mean±SD | 2.7±3.5 | 2.2±3.3 | 3.3±3.0 | 0.8±2.4 | 0.8±1.3 | 0.2±0.4 | 5.7±3.6 |
| Values are mean ±standard deviation, median with IQR (interquartile range) and the number of patients (%). | | | | | | | | |
